# Supplementary material for: Association of Lipopolysaccharide-Type Endotoxins with Retinal Neurodegeneration: The Alienor Study
Source: PubMed Central journal article supplement — Ophthalmol Sci. 2024 Aug 28;5(1):100610. doi: 10.1016/j.xops.2024.100610 (PMC11462263; doi:10.1016/j.xops.2024.100610), 2024-08-28
Supplement: mmc1.pdf [file mmc1.pdf]

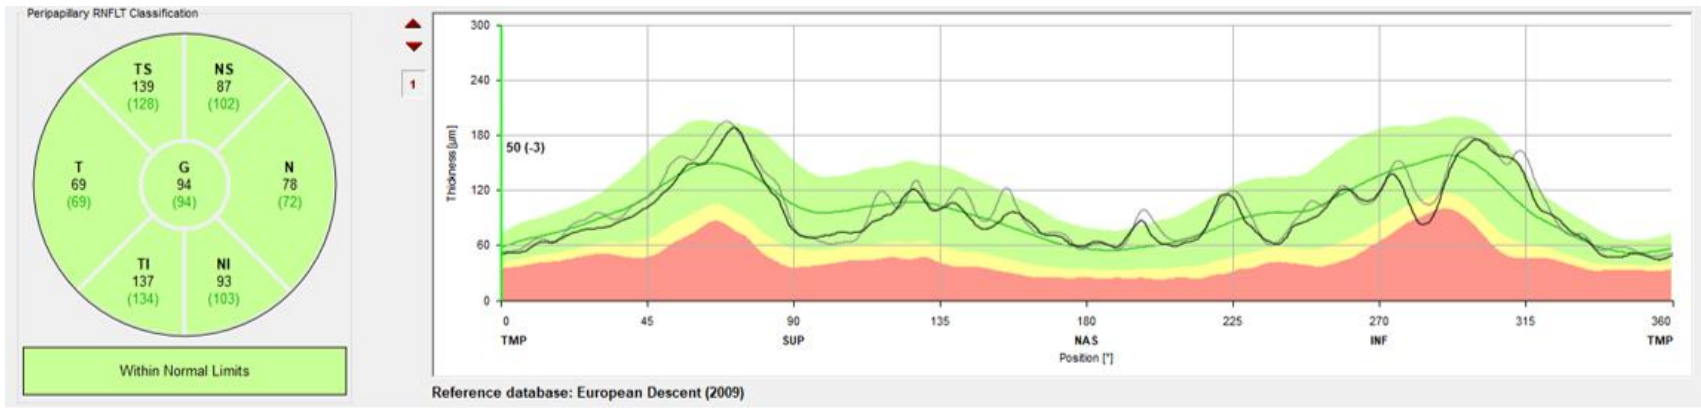

**Figure S2.** Example of the peripapillary retinal nerve fiber layer thickness (RNFLT) measurement by spectral-domain optical coherence tomography. Global peripapillary RNFLT was automatically segmented and calculated by the software.
