# Supplementary material for: Association of Lipopolysaccharide-Type Endotoxins with Retinal Neurodegeneration: The Alienor Study
Source: PubMed Central journal article supplement — Ophthalmol Sci. 2024 Aug 28;5(1):100610. doi: 10.1016/j.xops.2024.100610 (PMC11462263; doi:10.1016/j.xops.2024.100610), 2024-08-28
Supplement: mmc3.pdf [file mmc3.pdf]

**Table S1.** Fraction of missing/imputed data on subject level\*

|                                           | Analyzed subjects (n = 548) |
|-------------------------------------------|-----------------------------|
|                                           | n (%)                       |
| Low-density lipoprotein (LDL) cholesterol | 1 (0.2 %)                   |
| Smoking (pack-year)                       | 5 (0.9 %)                   |
| Social deprivation index                  | 6 (1.1 %)                   |
| Family history of glaucoma                | 11 (2.0 %)                  |
| Mediterranean diet score                  | 48 (8.8 %)                  |

\*If the variable is not listed here, no data was missing for this variable.
