# Supplementary material for: Association of Lipopolysaccharide-Type Endotoxins with Retinal Neurodegeneration: The Alienor Study
Source: PubMed Central journal article supplement — Ophthalmol Sci. 2024 Aug 28;5(1):100610. doi: 10.1016/j.xops.2024.100610 (PMC11462263; doi:10.1016/j.xops.2024.100610), 2024-08-28
Supplement: mmc4.pdf [file mmc4.pdf]

**Table S2.** Fraction of missing/imputed data on eye level\*

|                      | Analyzed eyes (n = 1062) |
|----------------------|--------------------------|
|                      | n (%)                    |
| Intraocular pressure | 12 (1.1 %)               |
| Axial length         | 432 (40.7 %)             |

\*If the variable is not listed here, no data was missing for this variable.
